# Supplementary material
Source: Springer Nature journal article supplement (https://www.springermedizin.de/resource/supplementary/12906_2012_1118_MOESM1_ESM.pdf/9519910)

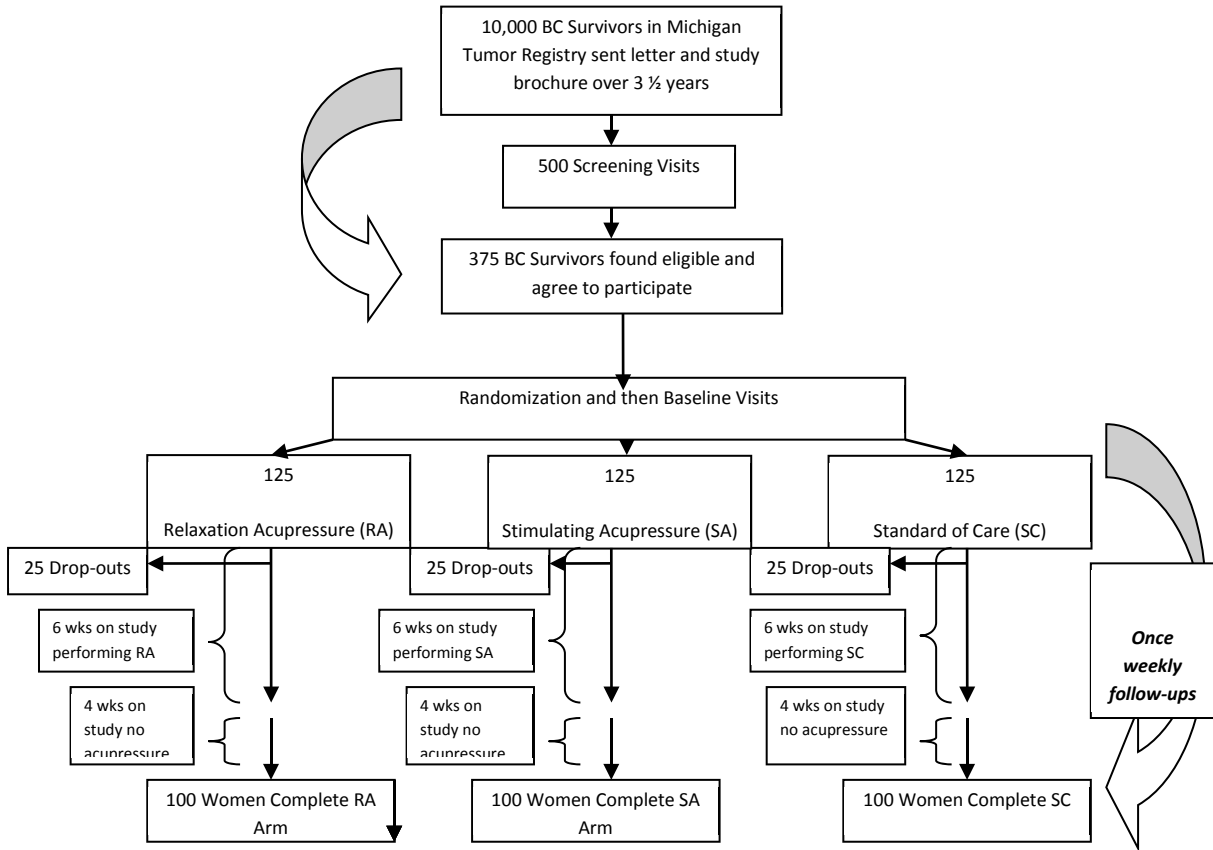

Supplement: MOESM1 [file 9519910]
